# Supplementary material
Source: PubMed Central journal article supplement (PMC6903428)
Supplement: NIHMS965304-supplement-1.pdf [file NIHMS965304-supplement-1.pdf]

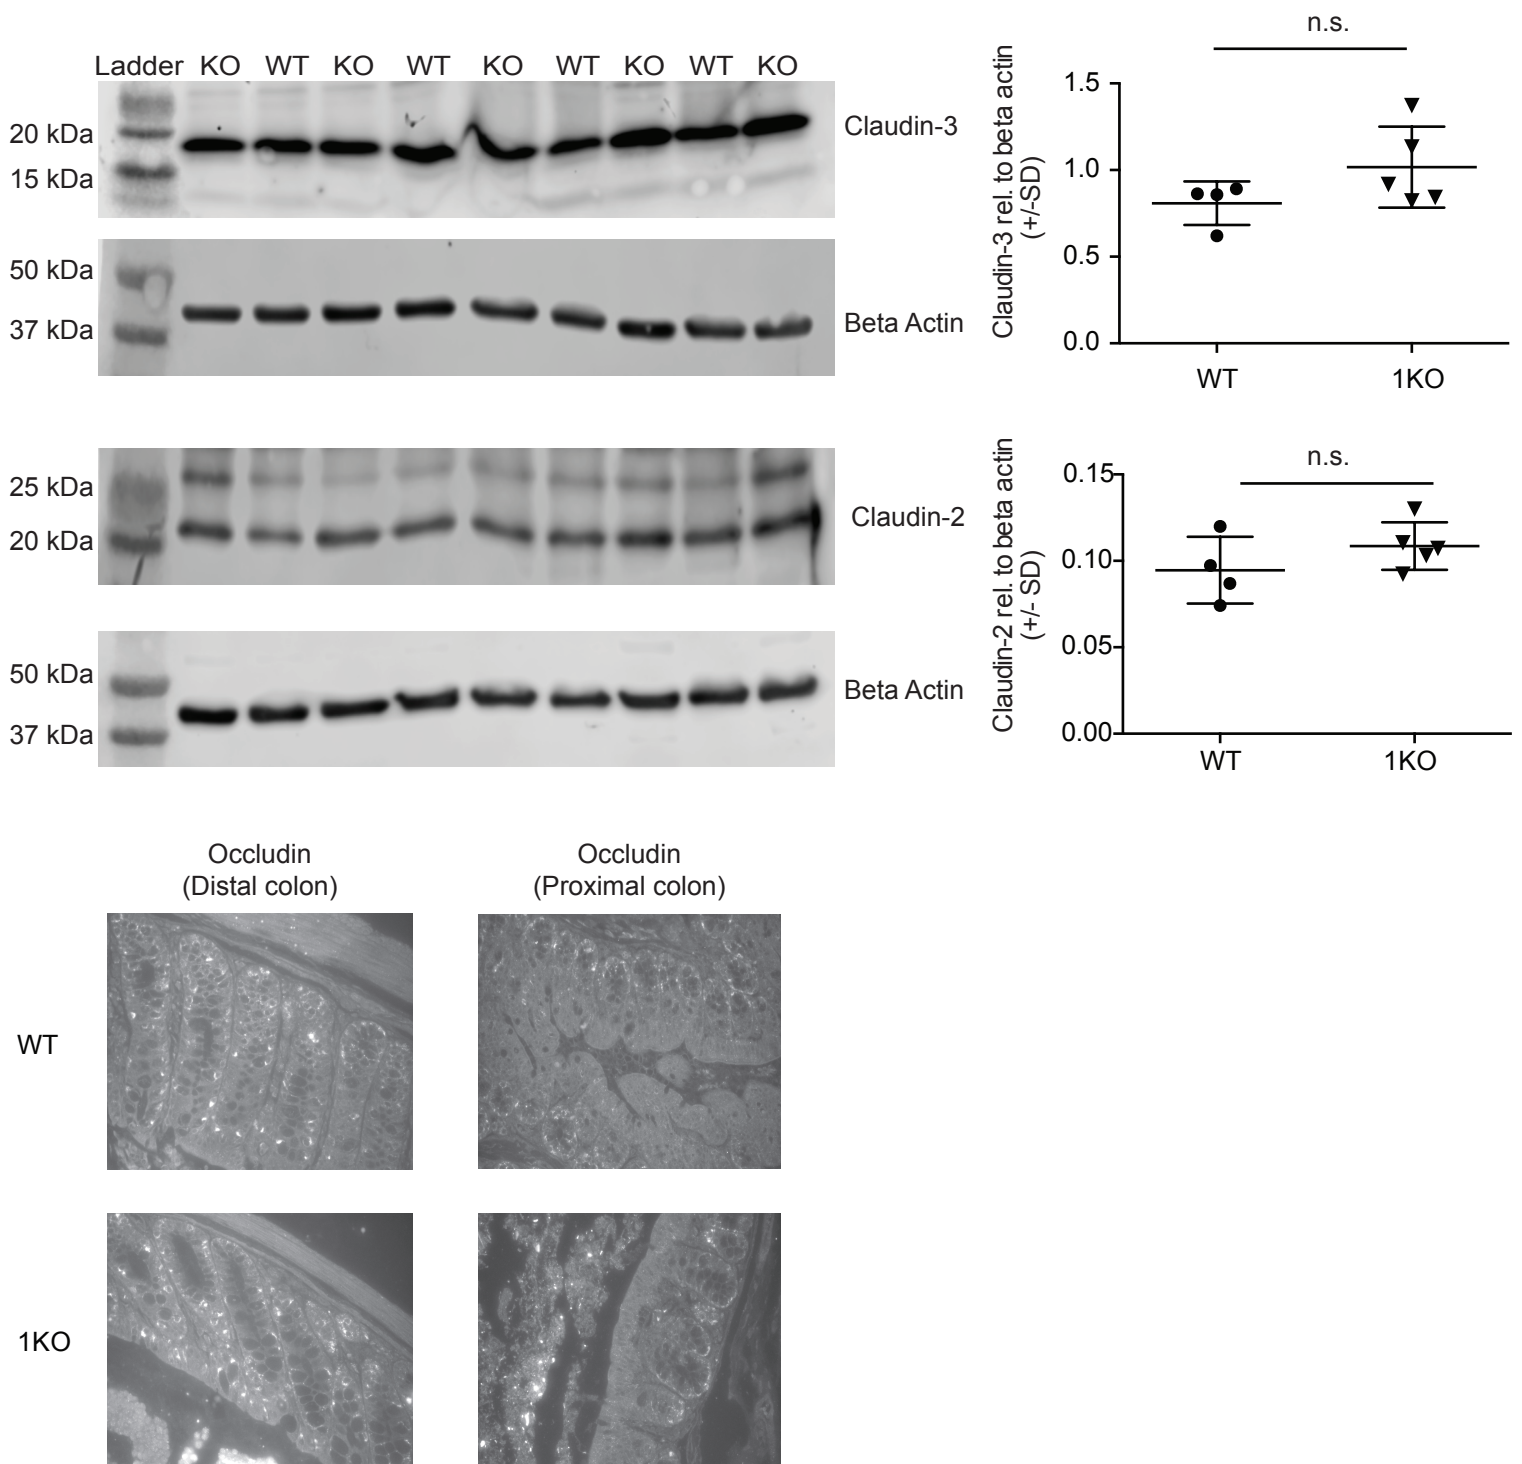

Supplementary Figure 1: Expression of Claudin 2 and Claudin 3 in WT and TLR1KO colon mucosal scrapings. Immune-fluorescence staining of Occludin in Distal and Proximal colon of WT and 1KO colon.

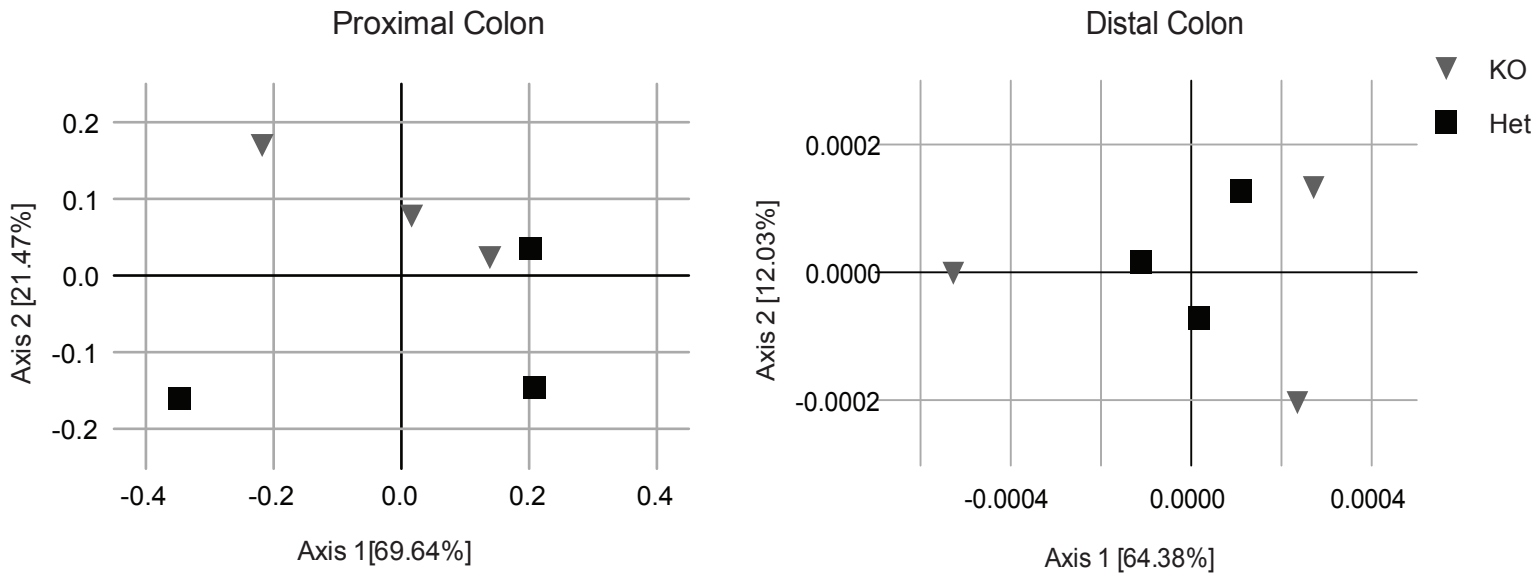

Supplementary Figure 2: Principle Coordinate Analysis of Proximal and Distal colon mucosal-associated bacterial communities

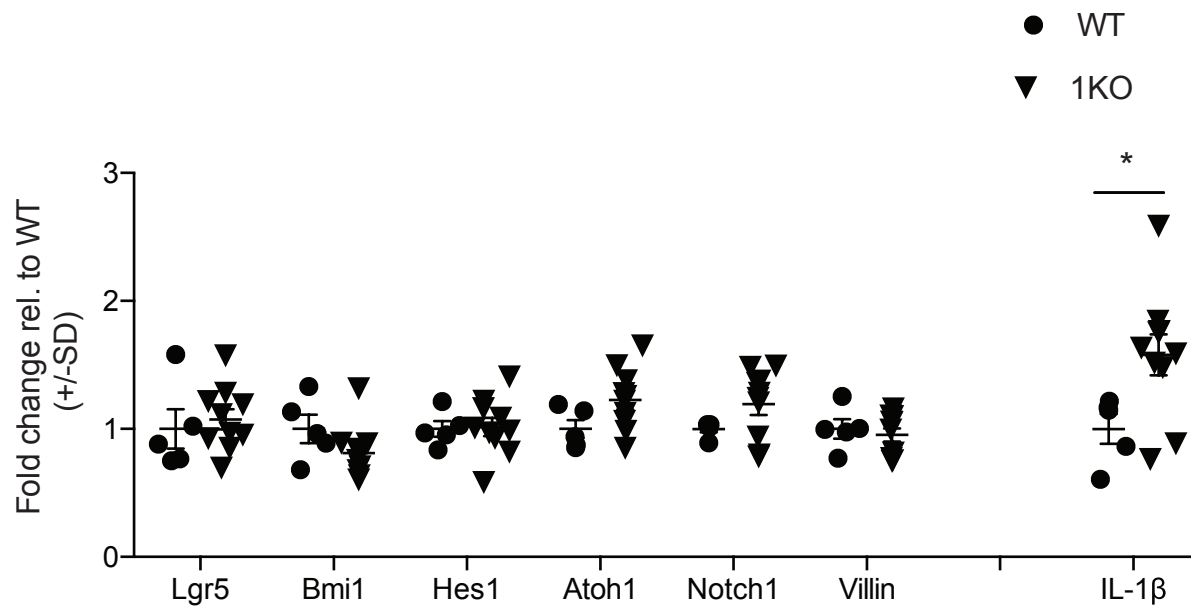

Supplementary Figure 3: Expression of stem cell and notch-signalling genes in colonic mucosa of 1KO and WT mice
